# Supplementary material for: Periodontal pathogens Porphyromonas gingivalis and Fusobacterium nucleatum promote tumor progression in an oral-specific chemical carcinogenesis model
Source: PubMed Central journal article supplement (PMC4673186; doi:10.18632/oncotarget.4209), 2015-06-08
Supplement: oncotarget-06-22613-s001.pdf [file oncotarget-06-22613-s001.pdf]

**SUPPLEMENTARY FIGURES**

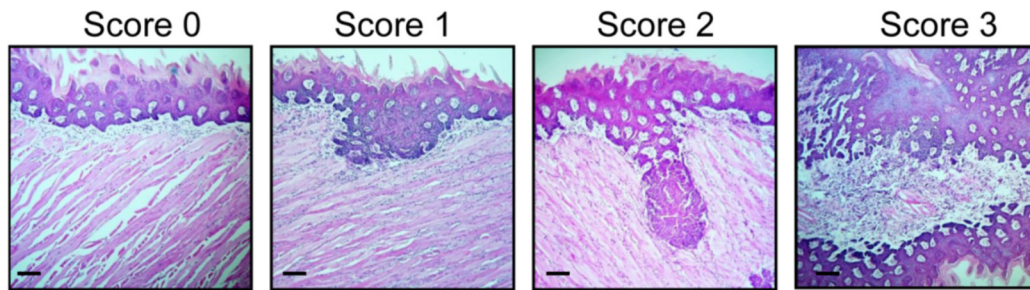

**Supplementary Figure 1: Tongue tumor invasion score.** Invasion was scored in a blinded fashion by the expert pathologist (S.F.) as follows: 0 = no evidence of invasion, 1 = malignant cells deep to basal cell layer, no invasion into muscle; 2 = minor invasion into striated muscle; 3 = invasion through the full depth of striated muscle. Representative images of H&E stained sections are shown. Magnification  $\times 100$ .

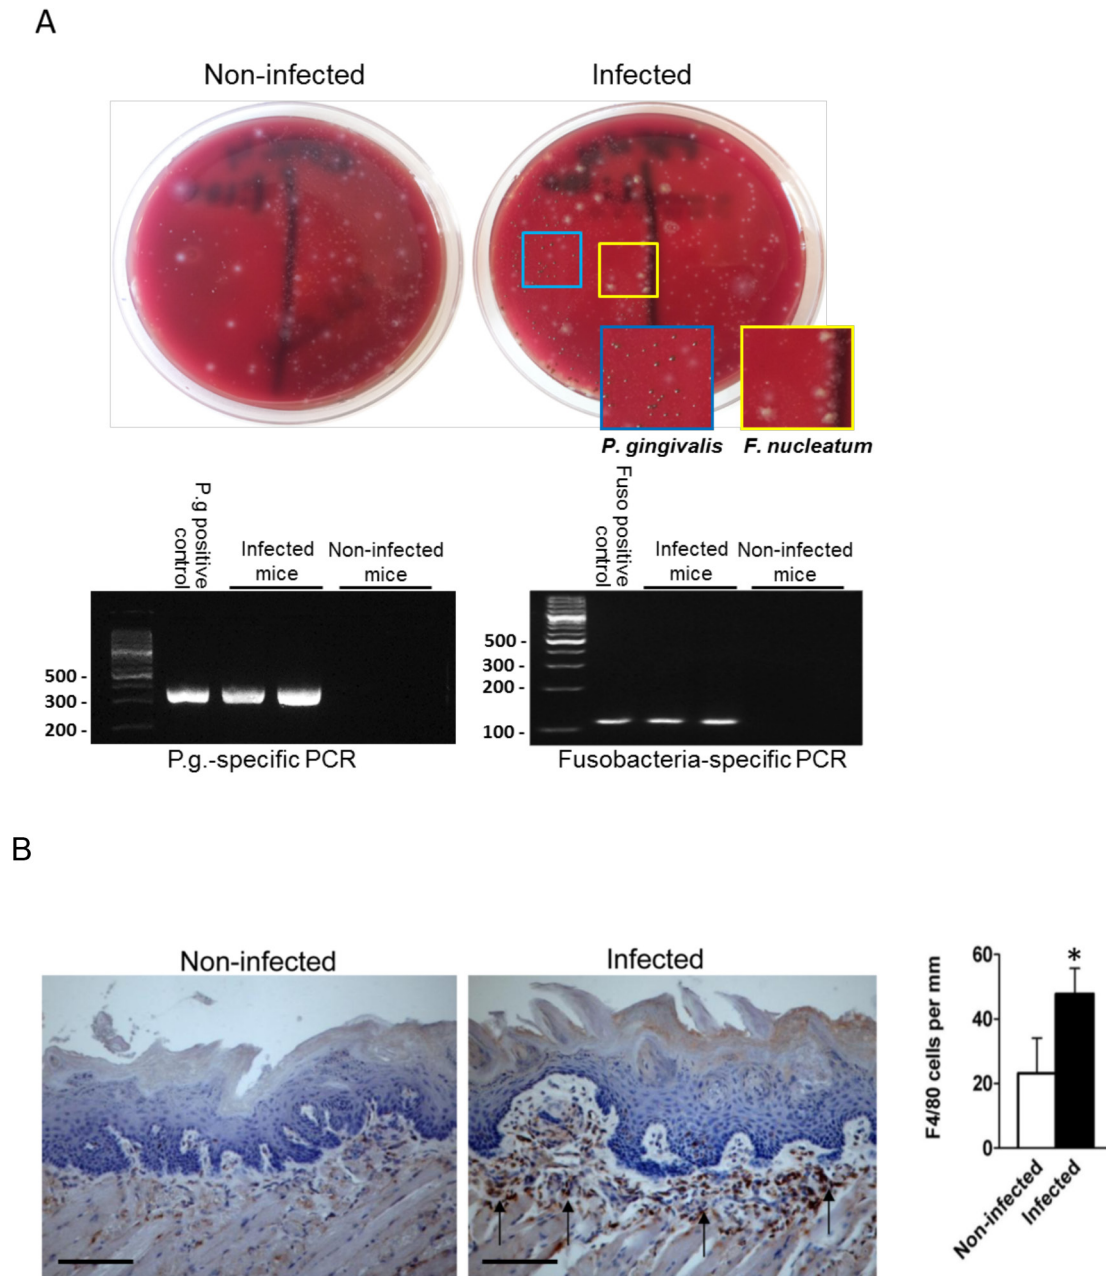

**Supplementary Figure 2: A. Recovery of *P. gingivalis* and *F. nucleatum* from tongues of infected mice.** The presence of both bacteria on the tongue surface was confirmed by swabbing, culturing and PCR with primers specific for *F. nucleatum* and *P. gingivalis*, as described in Methods. Top: representative images of bacterial colonies recovered from non-infected (left) and infected (right) mice are present. Insets: enlarged images of the areas delineated by blue line (representing *P. gingivalis* colonies, identified by black pigmentation) and by yellow line (representing *F. nucleatum* colonies, identified by yellow-gray color) are shown. Bottom: identity of *P. gingivalis* (left) and *F. nucleatum* (right), confirmed by colony PCR. **B. Increased macrophage infiltration in tongue sub-epithelium of mice infected with *P. gingivalis*/*F. nucleatum*.** Left and Middle: Immunostaining with anti F4/80 (black arrows) of tongue specimens harvested on experimental week 18 from non-infected (left) and infected (middle) mice. Original magnification  $\times 200$ . Right: Quantification of F4/80-positive macrophages. Data shown are mean  $\pm$  SD,  $n = 5$  mice per condition. \*\* $P < 0.01$ .

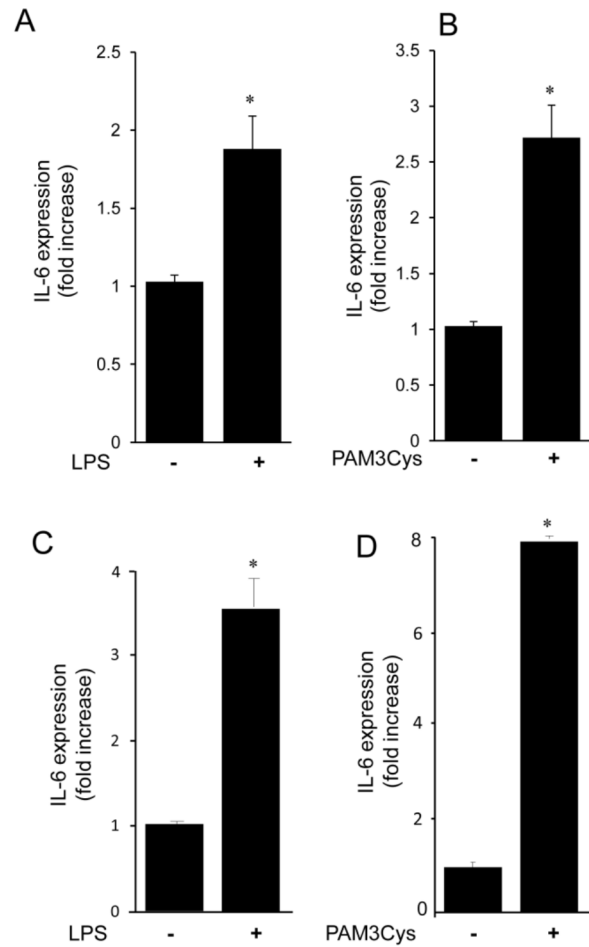

**Supplementary Figure 3: Increase in IL-6 expression by SCC cell lines in response to treatment with TLR 4 and TLR 2/1- specific ligands.** SCC-25 **A, B.** and CAL 27 **C, D.** cells were remained untreated or treated for 4 h with either LPS (**A, C**) or PAM3Cys (**B, D**). IL-6 expression was assessed by qRT-PCR. \* $P < 0.05$ .

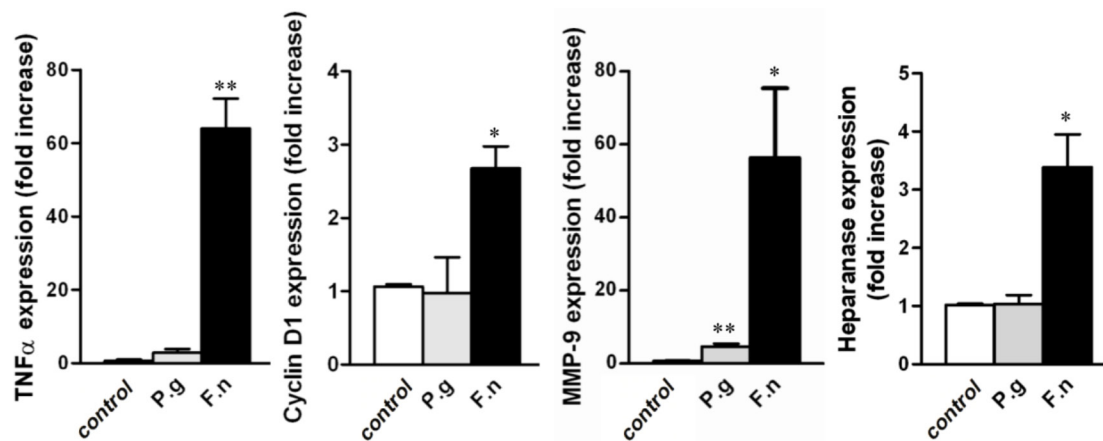

**Supplementary Figure 4: Increased expression of SCC-promoting biomolecules by SCC-25 cells following co-culture with either *P. gingivalis* or *F. nucleatum*.** SCC-25 cells were cultured alone or in the presence of *P. gingivalis* or *F. nucleatum*. qRT-PCR was used to assess expression of TNF $\alpha$  (4 hours of co-culture), cyclin D1, MMP9 and heparanase (24 h of co-culturing). \* $P < 0.05$ . \*\* $P < 0.01$ .
